# Supplementary material for: Comparison of count-based multimorbidity measures in predicting emergency admission and functional decline in older community-dwelling adults: a prospective cohort study
Source: PubMed Central journal article supplement — BMJ Open. 2016 Sep 20;6(9):e013089. doi: 10.1136/bmjopen-2016-013089 (PMC5051451; doi:10.1136/bmjopen-2016-013089), 2016-09-20

**Appendix 1: Ambulatory care sensitive conditions as defined by the Australian Victoria State Health Department**

| <b>Acute conditions</b>         | <b>Chronic conditions</b> | <b>Other and vaccine-preventable conditions</b> |
|---------------------------------|---------------------------|-------------------------------------------------|
| Cellulitis                      | Angina                    | Influenza                                       |
| Dehydration                     | Asthma                    | Pneumonia                                       |
| Dental conditions               | COPD                      | Other vaccine-preventable                       |
| Ear, nose and throat infections | Congestive heart failure  |                                                 |
| Gangrene                        | Convulsions and epilepsy  |                                                 |
| Gastroenteritis                 | Diabetes complications    |                                                 |
| Nutritional deficiencies        | Hypertension              |                                                 |
| Pelvic inflammatory disease     | Iron deficiency anaemia   |                                                 |
| Perforated/bleeding ulcer       |                           |                                                 |
| Pyelonephritis                  |                           |                                                 |

**Appendix 2: C-statistics (95% CI) for the outcome of  $\geq 1$  emergency admission (n=862) by different cut-points of the multimorbidity measures**

| Count cut-point                     | RxRisk-V<br>c-statistic (95% CI) | Number of medication classes<br>c-statistic (95% CI) | Disease count<br>c-statistic (95% CI) | Barnett conditions count<br>c-statistic (95% CI) | Charlson index<br>c-statistic (95% CI) |
|-------------------------------------|----------------------------------|------------------------------------------------------|---------------------------------------|--------------------------------------------------|----------------------------------------|
| <b>0 vs. <math>\geq 1</math></b>    | 0.50 (0.50, 0.51)                | 0.52 (0.51, 0.53)                                    | 0.52 (0.50, 0.53)                     | 0.54 (0.52, 0.57)                                | 0.58 (0.56, 0.60)                      |
| <b>0-1 vs. <math>\geq 2</math></b>  | 0.53 (0.52, 0.55)                | 0.54 (0.53, 0.55)                                    | 0.55 (0.53, 0.58)                     | 0.60 (0.58, 0.62)                                | 0.58 (0.56, 0.61)                      |
| <b>0-2 vs. <math>\geq 3</math></b>  | 0.57 (0.54, 0.59)                | 0.56 (0.54, 0.58)                                    | 0.59 (0.57, 0.63)                     | 0.60 (0.57, 0.62)                                | 0.57 (0.54, 0.60)                      |
| <b>0-3 vs. <math>\geq 4</math></b>  | 0.59 (0.56, 0.61)                | 0.56 (0.54, 0.59)                                    | 0.59 (0.55, 0.62)                     | 0.57 (0.53, 0.59)                                | 0.57 (0.55, 0.59)                      |
| <b>0-4 vs. <math>\geq 5</math></b>  | 0.60 (0.57, 0.63)                | 0.59 (0.56, 0.62)                                    | 0.58 (0.55, 0.61)                     | 0.56 (0.52, 0.58)                                | 0.54 (0.53, 0.55)                      |
| <b>0-5 vs. <math>\geq 6</math></b>  | 0.61 (0.58, 0.64)                | 0.62 (0.58, 0.65)                                    | 0.57 (0.54, 0.60)                     | 0.53 (0.51, 0.55)                                | 0.52 (0.51, 0.53)                      |
| <b>0-6 vs. <math>\geq 7</math></b>  | 0.61 (0.57, 0.64)                | 0.60 (0.56, 0.63)                                    |                                       |                                                  |                                        |
| <b>0-7 vs. <math>\geq 8</math></b>  | 0.59 (0.54, 0.63)                | 0.60 (0.57, 0.63)                                    |                                       |                                                  |                                        |
| <b>0-8 vs. <math>\geq 9</math></b>  | 0.57 (0.53, 0.59)                | 0.60 (0.57, 0.62)                                    |                                       |                                                  |                                        |
| <b>0-9 vs. <math>\geq 10</math></b> | 0.53 (0.51, 0.55)                | 0.57 (0.54, 0.60)                                    |                                       |                                                  |                                        |

**Appendix 3: Comparison of five multimorbidity measures, adjusted for age, gender and deprivation, at optimal cut-points for outcome of  $\geq 1$  emergency admission: receiver operating curve plot**

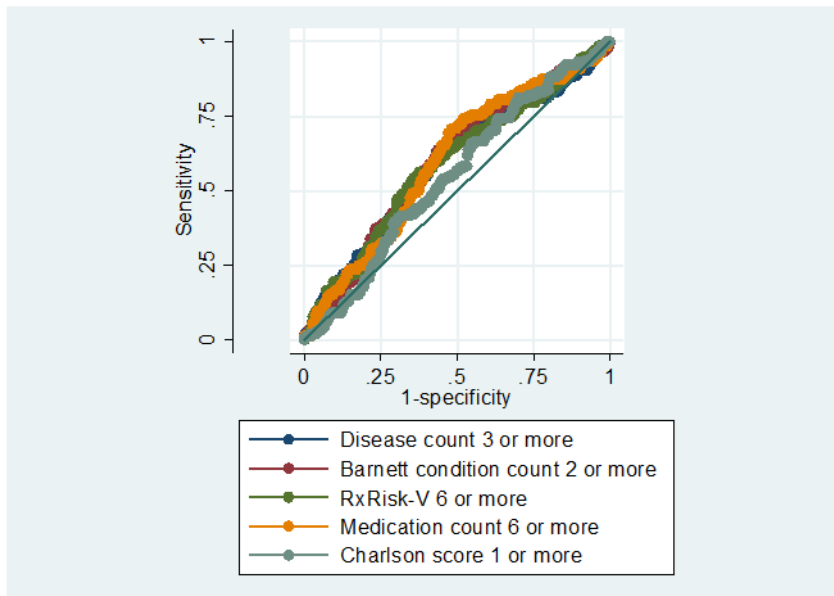

**Appendix 4: Different cut-points of multimorbidity measures with c-statistics (95% CI) for the outcome of  $\geq 1$  ACS emergency admission (n=862)**

| Count cut-point                     | RxRisk-V             | Number of medications | of Disease count  | Barnett conditions count | Charlson index       |                      |
|-------------------------------------|----------------------|-----------------------|-------------------|--------------------------|----------------------|----------------------|
|                                     | c-statistic (95% CI) |                       |                   |                          | c-statistic (95% CI) | c-statistic (95% CI) |
| <b>0 vs. <math>\geq 1</math></b>    | 0.51 (0.51, 0.51)    | 0.52 (0.52, 0.53)     | 0.53 (0.51, 0.54) | 0.54 (0.51, 0.57)        | 0.63 (0.60, 0.66)    |                      |
| <b>0-1 vs. <math>\geq 2</math></b>  | 0.54 (0.52, 0.55)    | 0.55 (0.54, 0.56)     | 0.55 (0.52, 0.59) | 0.61 (0.56, 0.65)        | 0.63 (0.60, 0.66)    |                      |
| <b>0-2 vs. <math>\geq 3</math></b>  | 0.58 (0.55, 0.60)    | 0.57 (0.53, 0.60)     | 0.59 (0.54, 0.64) | 0.60 (0.55, 0.65)        | 0.57 (0.53, 0.61)    |                      |
| <b>0-3 vs. <math>\geq 4</math></b>  | 0.61 (0.57, 0.64)    | 0.58 (0.54, 0.62)     | 0.58 (0.53, 0.64) | 0.60 (0.54, 0.65)        | 0.55 (0.52, 0.59)    |                      |
| <b>0-4 vs. <math>\geq 5</math></b>  | 0.63 (0.58, 0.67)    | 0.61 (0.56, 0.65)     | 0.59 (0.55, 0.64) | 0.56 (0.52, 0.61)        | 0.54 (0.51, 0.57)    |                      |
| <b>0-5 vs. <math>\geq 6</math></b>  | 0.62 (0.57, 0.67)    | 0.63 (0.58, 0.68)     | 0.57 (0.54, 0.62) | 0.53 (0.51, 0.54)        | 0.52 (0.50, 0.54)    |                      |
| <b>0-6 vs. <math>\geq 7</math></b>  | 0.62 (0.57, 0.68)    | 0.62 (0.56, 0.67)     |                   |                          |                      |                      |
| <b>0-7 vs. <math>\geq 8</math></b>  | 0.58 (0.52, 0.64)    | 0.63 (0.58, 0.69)     |                   |                          |                      |                      |
| <b>0-8 vs. <math>\geq 9</math></b>  | 0.58 (0.53, 0.63)    | 0.63 (0.57, 0.68)     |                   |                          |                      |                      |
| <b>0-9 vs. <math>\geq 10</math></b> | 0.53 (0.50, 0.57)    | 0.58 (0.52, 0.64)     |                   |                          |                      |                      |

**Appendix 5: Comparison of five multimorbidity measures, adjusted for age, gender and deprivation, for the outcome of ACS emergency admission: receiver operating curve plot**

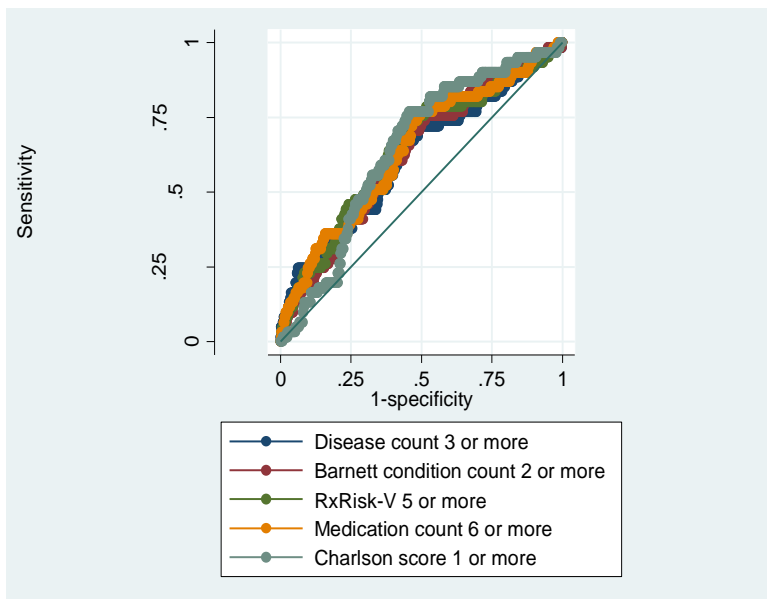

## Appendix 6: Comparison of follow-up postal questionnaire respondents and non-respondents

|                                                 | Questionnaire respondents (n=673) | Questionnaire non-respondents (n=133) | Difference between the two groups |
|-------------------------------------------------|-----------------------------------|---------------------------------------|-----------------------------------|
|                                                 | Median (IQR)                      | Median (IQR)                          | p-value                           |
| <b>Age</b>                                      | 76 (73, 80)                       | 78 (73, 82)                           | 0.02                              |
| <b>Deprivation</b>                              | 1.36 (-0.64, 2.88)                | 2.16 (-0.20, 3.39)                    | 0.04                              |
| <b>Number of medication classes</b>             | 5 (3, 7)                          | 6 (4, 9)                              | 0.001                             |
| <b>Gender</b>                                   | Number (%)                        | Number (%)                            |                                   |
| Male                                            | 318 (47)                          | 57 (40)                               |                                   |
| Female                                          | 355 (53)                          | 87 (60)                               | 0.16                              |
| <b>Education*</b>                               |                                   |                                       |                                   |
| Basic education                                 | 397 (59)                          | 101 (71)                              |                                   |
| Upper/post-secondary                            | 272 (41)                          | 41 (29)                               | 0.01                              |
| <b>Social class</b>                             |                                   |                                       |                                   |
| Unskilled                                       | 151 (22)                          | 47 (33)                               |                                   |
| Skilled                                         | 522 (78)                          | 97 (67)                               | 0.01                              |
| <b>Charlson comorbidity weights<sup>§</sup></b> |                                   |                                       |                                   |
| 0                                               | 286 (43)                          | 49 (34)                               |                                   |
| ≥1                                              | 387 (57)                          | 95 (66)                               | 0.06                              |

\*Education was missing for n=6 (baseline). <sup>§</sup>Charlson comorbidity was missing for n=2 (baseline).

**Appendix 7: Different cut-points of multimorbidity measures with c-statistics (95% CI) for the outcome of functional decline (n=666)**

| Count point        | cut- | RxRisk-V             | Number medications   | of | Disease count        | Barnett conditions count | Charlson index       |
|--------------------|------|----------------------|----------------------|----|----------------------|--------------------------|----------------------|
|                    |      | c-statistic (95% CI) | c-statistic (95% CI) |    | c-statistic (95% CI) | c-statistic (95% CI)     | c-statistic (95% CI) |
| <b>0 vs. ≥1</b>    |      | 0.51 (0.50, 0.51)    | 0.51 (0.49, 0.53)    |    | 0.51 (0.47, 0.55)    | 0.51 (0.48, 0.55)        | 0.57 (0.52, 0.62)    |
| <b>0-1 vs. ≥2</b>  |      | 0.54 (0.53, 0.55)    | 0.53 (0.50, 0.55)    |    | 0.55 (0.51, 0.59)    | 0.55 (0.51, 0.59)        | 0.57 (0.50, 0.64)    |
| <b>0-2 vs. ≥3</b>  |      | 0.54 (0.50, 0.57)    | 0.53 (0.48, 0.58)    |    | 0.56 (0.51, 0.62)    | 0.57 (0.52, 0.62)        | 0.59 (0.52, 0.66)    |
| <b>0-3 vs. ≥4</b>  |      | 0.55 (0.50, 0.60)    | 0.55 (0.52, 0.59)    |    | 0.55 (0.50, 0.60)    | 0.53 (0.49, 0.58)        | 0.53 (0.49, 0.56)    |
| <b>0-4 vs. ≥5</b>  |      | 0.61 (0.56, 0.65)    | 0.58 (0.54, 0.62)    |    | 0.56 (0.51, 0.62)    | 0.54 (0.51, 0.57)        | 0.51 (0.47, 0.54)    |
| <b>0-5 vs. ≥6</b>  |      | 0.60 (0.54, 0.67)    | 0.57 (0.51, 0.62)    |    | 0.52 (0.47, 0.56)    | 0.52 (0.49, 0.55)        | 0.51 (0.49, 0.53)    |
| <b>0-6 vs. ≥7</b>  |      | 0.56 (0.50, 0.62)    | 0.59 (0.50, 0.67)    |    |                      |                          |                      |
| <b>0-7 vs. ≥8</b>  |      | 0.55 (0.48, 0.61)    | 0.59 (0.51, 0.66)    |    |                      |                          |                      |
| <b>0-8 vs. ≥9</b>  |      | 0.55 (0.50, 0.60)    | 0.56 (0.50, 0.63)    |    |                      |                          |                      |
| <b>0-9 vs. ≥10</b> |      | 0.51 (0.47, 0.55)    | 0.54 (0.49, 0.60)    |    |                      |                          |                      |

**Appendix 8: Comparison of five multimorbidity measures, adjusted for age, gender and deprivation, at optimal cut-points for the outcome of functional decline: receiver operating curve plot**

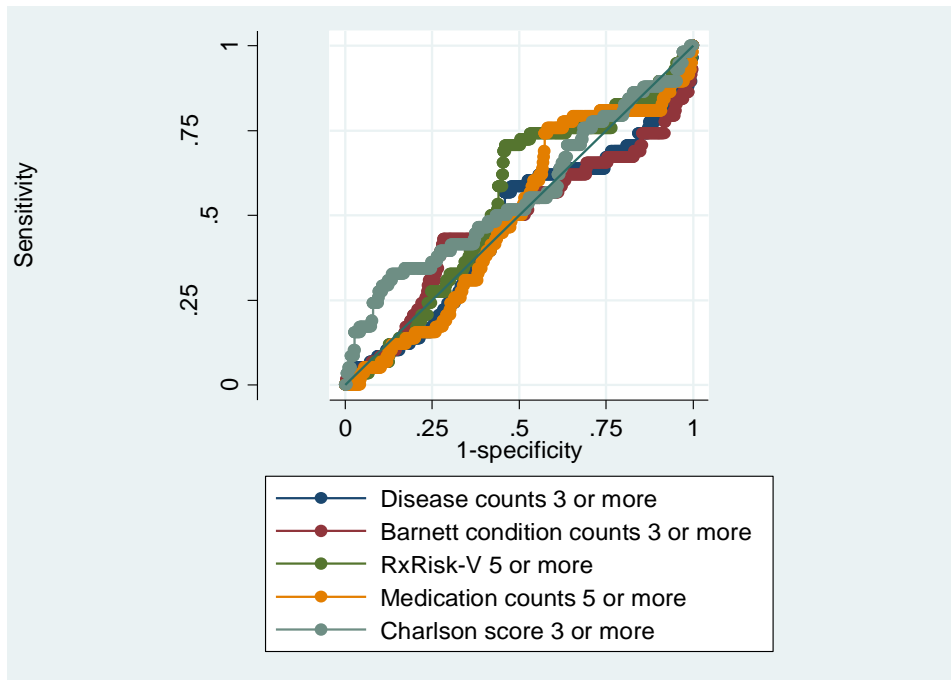

Supplement: bmjopen-2016-013089supp_appendices.pdf [file bmjopen-2016-013089supp_appendices.pdf]
